# Supplementary material for: Secondary effectiveness factors for catalytic reactions in series: extension to slab, cylindrical, and spherical geometries
Source: Royal Society of Chemistry journal article supplement (doi:10.1039/d0re00242a), 2020-01-01
Supplement: d0re00242a1.pdf [file d0re00242a1.pdf]

# Supplementary Information: Secondary Effectiveness Factors for Catalytic Reactions in Series: Extension to Slab, Cylindrical, and Spherical Geometries

Armin Shayesteh Zadeh and Baron Peters

## S.1 Concentration profile of $B$ in cylindrical geometry

Mass balance equation for  $B$  in cylindrical geometry is

$$\frac{d^2 \bar{C}_B}{d\bar{r}^2} + \frac{1}{\bar{r}} \frac{d\bar{C}_B}{d\bar{r}} - \Phi_B^2 \bar{C}_B = -\Phi_A^2 \gamma \delta \bar{C}_A \quad (\text{S.1})$$

with boundary conditions

$$\begin{cases} \bar{C}_B(1) = 1 \\ \bar{C}_B(\bar{r}) \text{ bounded as } \bar{r} \rightarrow 0. \end{cases}$$

With definitions for dimensionless parameters from the main text, the solution to equation (S.1) will be

$$\bar{C}_B(\bar{r}) = C_1 I_0(\Phi_B \bar{r}) + C_2 K_0(\Phi_B \bar{r}) + \bar{C}_{B_{NH}}. \quad (\text{S.2})$$

Here,  $\bar{C}_{B_{NH}}$  is the solution for the non-homogeneous part of the ODE. Substituting for  $\bar{C}_A$  from the results in the main text and using the method of undetermined coefficients, we get

$$\bar{C}_{B_{NH}} = \frac{\Phi_A^2 \gamma \delta}{\Phi_B^2 - \Phi_A^2} \frac{I_0(\Phi_A \bar{r})}{I_0(\Phi_A)}. \quad (\text{S.3})$$

Substituting  $\bar{C}_{B_{NH}}$  back into equation (S.2) and matching the boundary conditions gives

$$\begin{aligned} \bar{C}_B(\bar{r}) &= \left[ 1 - \frac{\Phi_A^2 \gamma \delta}{\Phi_B^2 - \Phi_A^2} \right] \frac{I_0(\Phi_B \bar{r})}{I_0(\Phi_B)} + \frac{\Phi_A^2 \gamma \delta}{\Phi_B^2 - \Phi_A^2} \frac{I_0(\Phi_A \bar{r})}{I_0(\Phi_A)} \\ &= \frac{I_0(\Phi_B \bar{r})}{I_0(\Phi_B)} - \gamma \delta \Phi_A^2 \frac{\frac{I_0(\Phi_B \bar{r})}{I_0(\Phi_B)} - \frac{I_0(\Phi_A \bar{r})}{I_0(\Phi_A)}}{\Phi_B^2 - \Phi_A^2}. \end{aligned} \quad (\text{S.4})$$

## S.2 Concentration profile of $B$ in spherical geometry

Mass balance equation for  $B$  in spherical geometry is

$$\frac{1}{\bar{r}^2} \frac{d}{d\bar{r}} \left( \bar{r}^2 \frac{d\bar{C}_B}{d\bar{r}} \right) - \Phi_B^2 \bar{C}_B = -\Phi_A^2 \gamma \delta \bar{C}_A \quad (\text{S.5})$$

with boundary conditions

$$\begin{cases} \bar{C}_B(1) = 1 \\ \bar{C}_B(\bar{r}) \text{ bounded as } \bar{r} \rightarrow 0. \end{cases}$$

Equation (S.5) is a non-homogeneous second order ODE. The solution will be of the form

$$\bar{C}_B(\bar{r}) = C_1(\bar{r}) \frac{\cosh(\Phi_B \bar{r})}{\bar{r}} + C_2(\bar{r}) \frac{\sinh(\Phi_B \bar{r})}{\bar{r}}. \quad (\text{S.6})$$

Having already solved for  $\bar{C}_A(\bar{r})$ , we use variation of parameters to find  $C_1(\bar{r})$  and  $C_2(\bar{r})$ . The Wronskian is

$$W = \begin{vmatrix} \frac{\cosh(\Phi_B \bar{r})}{\Phi_B \sinh(\Phi_B \bar{r}) \bar{r}} - \frac{\cosh(\Phi_B \bar{r})}{\bar{r}^2} & \frac{\sinh(\Phi_B \bar{r})}{\Phi_B \cosh(\Phi_B \bar{r}) \bar{r}} - \frac{\sinh(\Phi_B \bar{r})}{\bar{r}^2} \end{vmatrix} = \frac{\Phi_B}{\bar{r}^2}. \quad (\text{S.7})$$

$C_1(\bar{r})$  and  $C_2(\bar{r})$  are defined as

$$\begin{aligned} C_1(\bar{r}) &= - \int d\bar{r} \frac{\sinh(\Phi_B \bar{r})}{W \bar{r}} (-\Phi_A^2 \gamma \delta \bar{C}_A) \\ &= \frac{\Phi_A^2 \gamma \delta}{2\Phi_B \sinh(\Phi_A)} \left[ \frac{1}{\Phi_B + \Phi_A} \sinh((\Phi_B + \Phi_A)\bar{r}) - \frac{1}{\Phi_B - \Phi_A} \sinh((\Phi_B - \Phi_A)\bar{r}) \right] + C'_1 \end{aligned} \quad (\text{S.8})$$

and

$$\begin{aligned} C_2(\bar{r}) &= \int d\bar{r} \frac{\cosh(\Phi_B \bar{r})}{W \bar{r}} (-\Phi_A^2 \gamma \delta \bar{C}_A) \\ &= \frac{-\Phi_A^2 \gamma \delta}{2\Phi_B \sinh(\Phi_A)} \left[ \frac{1}{\Phi_B + \Phi_A} \cosh((\Phi_B + \Phi_A)\bar{r}) - \frac{1}{\Phi_B - \Phi_A} \cosh((\Phi_B - \Phi_A)\bar{r}) \right] + C'_2. \end{aligned} \quad (\text{S.9})$$

Replacing these back into equation (S.6) gives

$$\bar{C}_B(\bar{r}) = \frac{\Phi_A^2 \gamma \delta}{\Phi_B^2 - \Phi_A^2} \frac{\sinh(\Phi_A \bar{r})}{\bar{r} \sinh(\Phi_A)} + C'_1 \frac{\cosh(\Phi_B \bar{r})}{\bar{r}} + C'_2 \frac{\sinh(\Phi_B \bar{r})}{\bar{r}} \quad (\text{S.10})$$

and matching the boundary conditions we get  $C'_1$  and  $C'_2$  as

$$\begin{cases} C'_1 = 0 \\ C'_2 = \frac{1}{\sinh(\Phi_B)} \left( 1 - \frac{\Phi_A^2 \gamma \delta}{\Phi_B^2 - \Phi_A^2} \right). \end{cases}$$

Substituting these expressions back into equation (S.10) gives us the final solution

$$\begin{aligned} \bar{C}_B(\bar{r}) &= \left[ 1 - \frac{\Phi_A^2 \gamma \delta}{\Phi_B^2 - \Phi_A^2} \right] \frac{\sinh(\Phi_B \bar{r})}{\bar{r} \sinh(\Phi_B)} + \frac{\Phi_A^2 \gamma \delta}{\Phi_B^2 - \Phi_A^2} \frac{\sinh(\Phi_A \bar{r})}{\bar{r} \sinh(\Phi_A)} \\ &= \frac{\sinh(\Phi_B \bar{r})}{\bar{r} \sinh(\Phi_B)} - \gamma \delta \Phi_A^2 \frac{\frac{\sinh(\Phi_B \bar{r})}{\bar{r} \sinh(\Phi_B)} - \frac{\sinh(\Phi_A \bar{r})}{\bar{r} \sinh(\Phi_A)}}{\Phi_B^2 - \Phi_A^2}. \end{aligned} \quad (\text{S.11})$$

### S.3 Secondary effectiveness factor for the special case of $\Phi_A = \Phi_B = \Phi$

The secondary effectiveness factor (irrespective of the geometry) is given by

$$\eta_{B \rightarrow C} = \eta(\Phi_B) - \gamma \delta \Phi_A^2 \frac{\eta(\Phi_B) - \eta(\Phi_A)}{\Phi_B^2 - \Phi_A^2}. \quad (\text{S.12})$$

In the limit where  $\Phi_B \rightarrow \Phi_A = \Phi$  we have

$$\lim_{\Phi_B \rightarrow \Phi} \eta_{B \rightarrow C} = \eta(\Phi) - \gamma \delta \Phi^2 \lim_{\Phi_B \rightarrow \Phi} \frac{\eta(\Phi_B) - \eta(\Phi)}{\Phi_B^2 - \Phi^2}. \quad (\text{S.13})$$

The limit on the right side of this equation is indeterminate. L'Hospital's Rule can be used here to give

$$\begin{aligned} \eta_{B \rightarrow C} &= \eta(\Phi) - \gamma \delta \Phi^2 \lim_{\Phi_B \rightarrow \Phi} \frac{\frac{d\eta(\Phi_B)}{d\Phi} |_{\Phi}}{\frac{d\Phi_B^2}{d\Phi} |_{\Phi}} \\ &= \eta(\Phi) - \gamma \delta \Phi^2 \frac{\frac{d\eta}{d\Phi}}{\frac{d\Phi^2}{d\Phi}} \\ &= \eta \left( 1 - \frac{\gamma \delta}{2} \frac{d \ln(\eta)}{d \ln(\Phi)} \right). \end{aligned} \quad (\text{S.14})$$
